# Supplementary material for: Quantitation of fentanyl analogs in dried blood spots by flow-through desorption coupled to online solid phase extraction tandem mass spectrometry
Source: Royal Society of Chemistry journal article supplement (doi:10.1039/c7ay00532f), 2017-01-01

Supplemental Table 1: The precursor and product ions for each analyte.

Transitions with a \* were used for quantitation, a † indicates an internal standard transition.

| Analyte                   | Precursor Ion (m/z) | Product Ion (m/z) |
|---------------------------|---------------------|-------------------|
| Fentanyl                  | 337.3               | 188.3*            |
|                           |                     | 216.2             |
|                           | 342.1               | 188.2†            |
| Sufentanil                | 387.4               | 238.3*            |
|                           |                     | 111.2             |
|                           | 392.1               | 111.0†            |
| Carfentanil               | 395.4               | 335.2*            |
|                           |                     | 246.0             |
|                           | 400.3               | 340.3†            |
| Alfentanil                | 417.2               | 165.1*            |
|                           |                     | 197.1             |
|                           | 423.0               | 268.0†            |
| Lofentanil                | 409.3               | 134.2*            |
|                           |                     | 200.2             |
| $\alpha$ -methyl fentanil | 351.3               | 105.1*            |
|                           |                     | 202.1             |
| $\beta$ -methyl fentanil  | 351.3               | 119.1*            |

Supplemental Figure 1: SPE-MS/MS extracted ion chromatogram of fentanyl analogs eluted from 5  $\mu$ L dried blood spots at 1.0 ng/mL. (A) Fentanyl, (B) Carfentanil, (C) Lofentanil, (D) Alfentanil, (E) 3-methyl fentanyl, (F)  $\alpha$ -methyl fentanyl

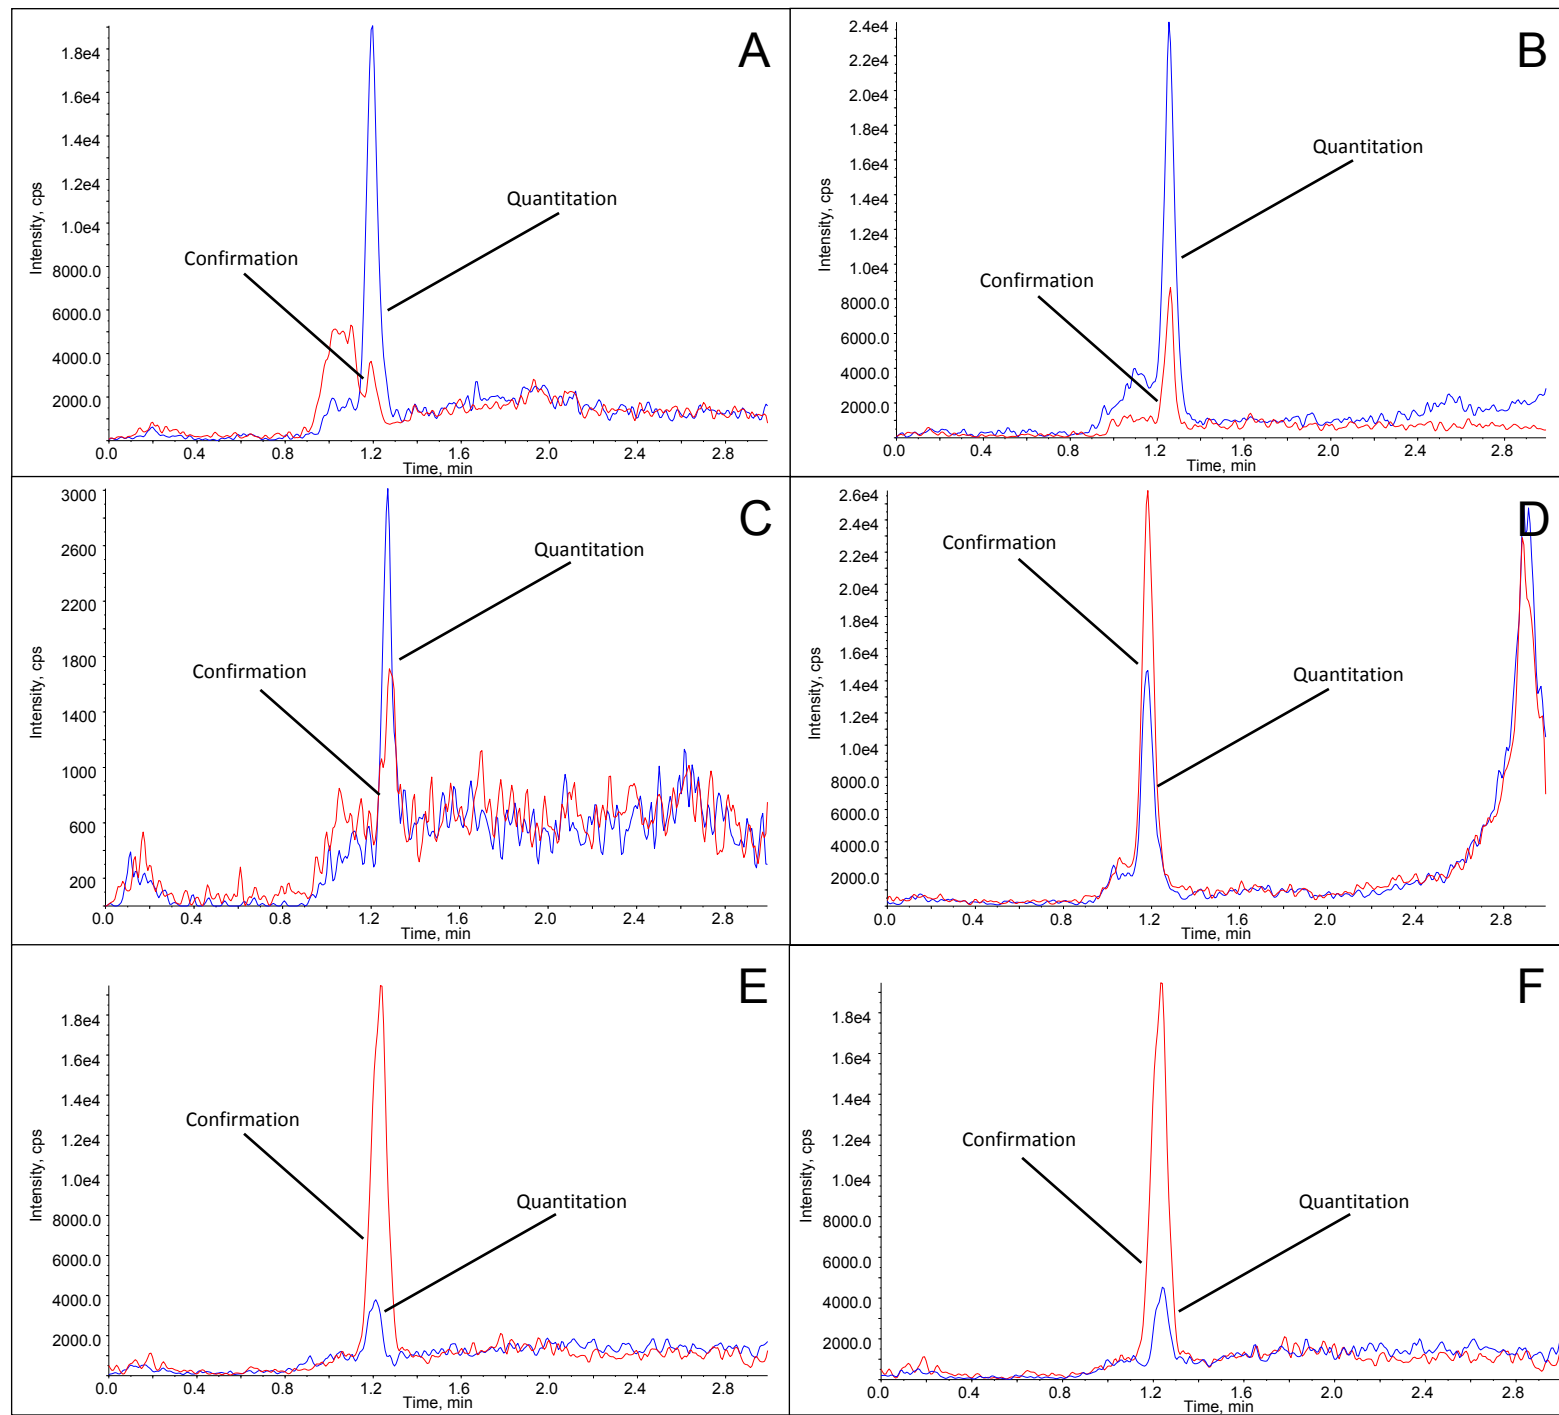

Supplement: c7ay00532f1.pdf [file c7ay00532f1.pdf]
